# Supplementary material for: Immigrant Perspectives of Social Connection in a Nontraditional Migration Area (Formally “Socioecological Connectedness: Exploring Social and Community Foundations of Immigrant Health and Wellness”)
Source: Preprints.org preprint supplement (doi:10.20944/preprints202401.1732.v1), 2024-01-24
Supplement: Supplementary file 1 [file supplementary]

## NOT HUMAN RESEARCH DETERMINATION

January 23, 2023

[Farrah Jacquez](#)  
[A&S Psychology](#)

Dear [Farrah Jacquez](#),

|                     |                                                                                                |
|---------------------|------------------------------------------------------------------------------------------------|
| Type of Submission: | Initial Study                                                                                  |
| Title of Study:     | Social & Community Factors Promoting Health among Latinx Immigrants in Cincinnati              |
| Investigator:       | <a href="#">Farrah Jacquez</a>                                                                 |
| IRB ID:             | 2023-0034                                                                                      |
| Funding:            | Name: CCTST Business Office                                                                    |
| Documents Reviewed: | • Jacquez Social & Community Health Promotion project non-human subjects protocol 1-11-23.docm |

On **1/23/2023**, the IRB reviewed the above submission and determined that the proposed activity is not research involving human subjects as defined by DHHS, DOJ and FDA regulations.

IRB review and approval by this organization is not required. This determination applies only to the activities described in the IRB submission and does not apply should any changes be made. If changes are made and there are questions about whether these activities are research involving human in which the organization is engaged, please submit a new request to the IRB for a determination. You can create a modification by clicking **Create Modification/CR** within the study.

### **Statement regarding International Conference on Harmonization and Good Clinical Practices**

The Institutional Review Board is duly constituted (fulfilling FDA requirements for diversity), has written procedures for initial and continuing review of clinical trials: prepares written minutes of convened meetings and retains records pertaining to the review and approval process all in compliance with requirements defined in 21 CFR Parts 50, 56 and 312 Code of Federal Regulations. This institution is in compliance with the ICH GCP as adopted by FDA/DHHS.

**Please note:** This review is through the IRB only. You may be responsible for reporting to other regulatory officials. Please check with your institution and department to ensure you have met all reporting requirements.

*Thank you for your cooperation during the review process.*
